# Supplementary material
Source: PubMed Central journal article supplement (PMC6166130)

Fig 2A

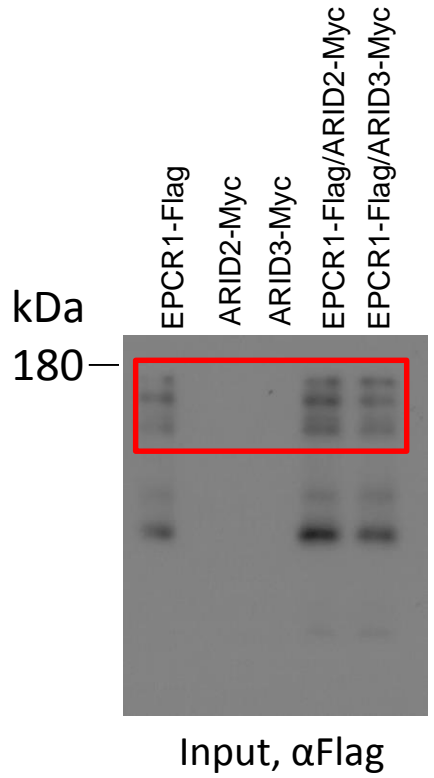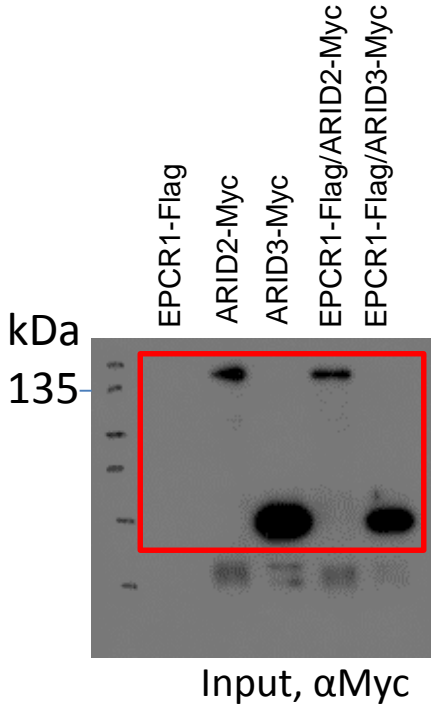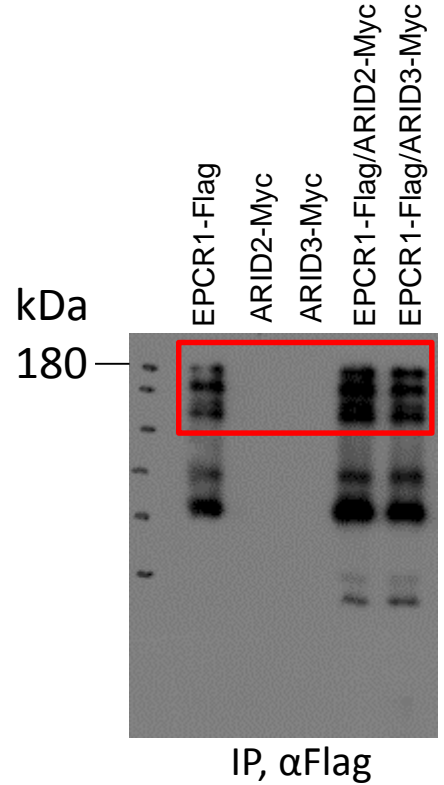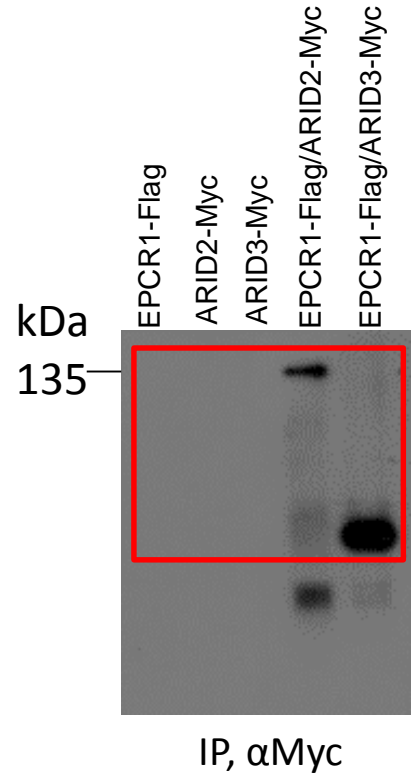

Fig 2B

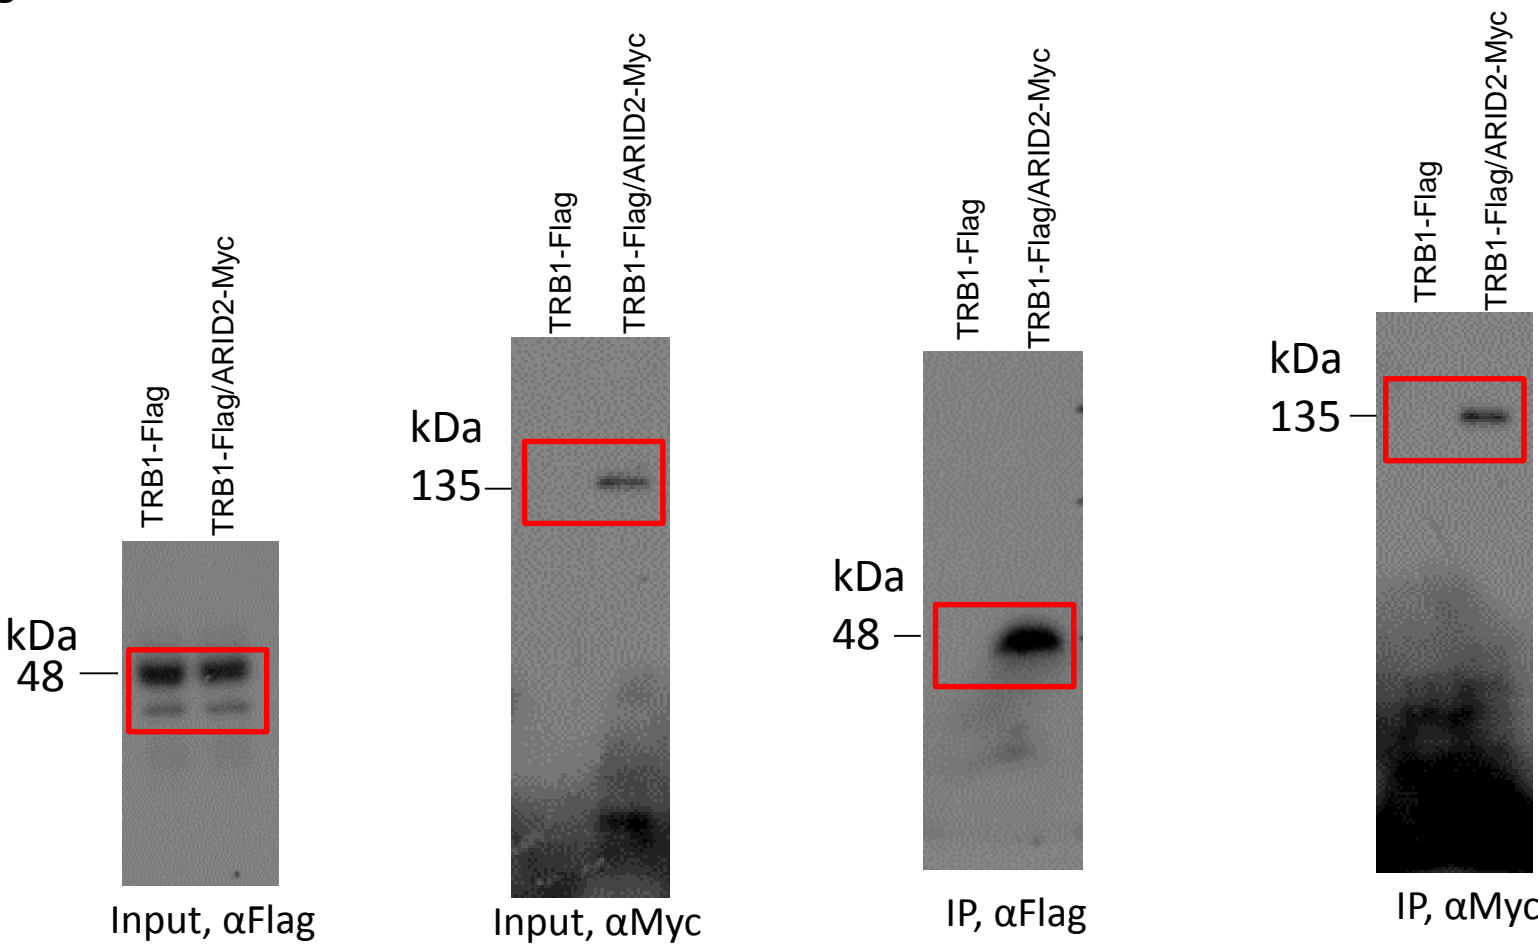

Fig 2C

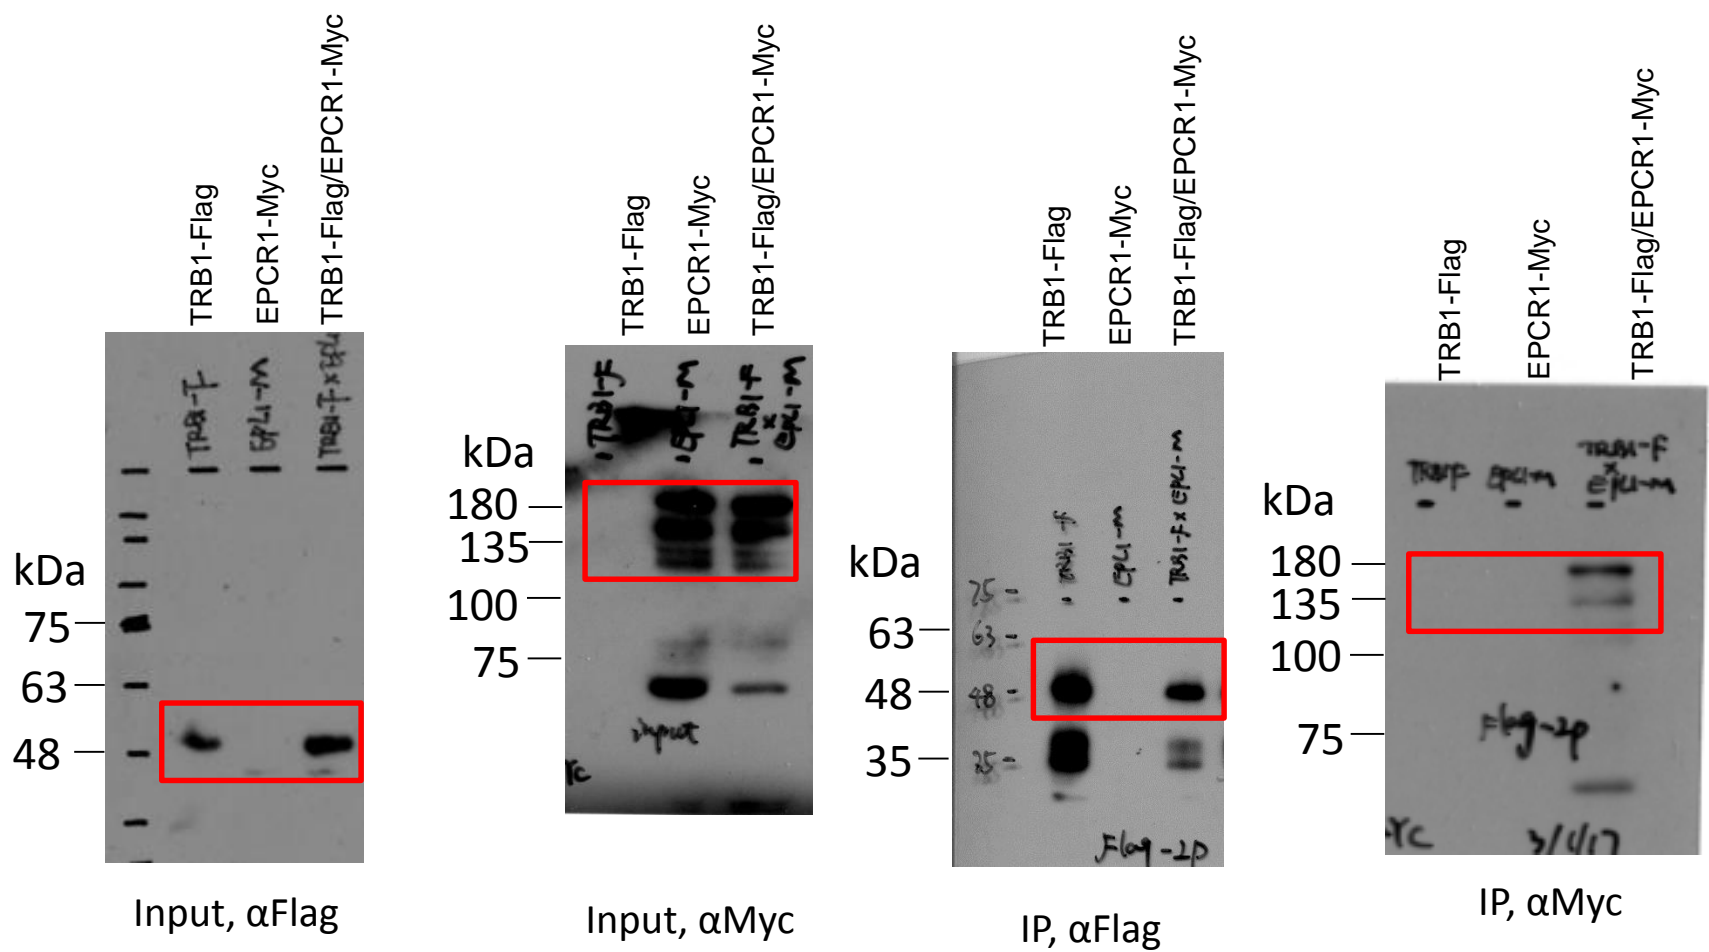

Figure 2E

Left panel

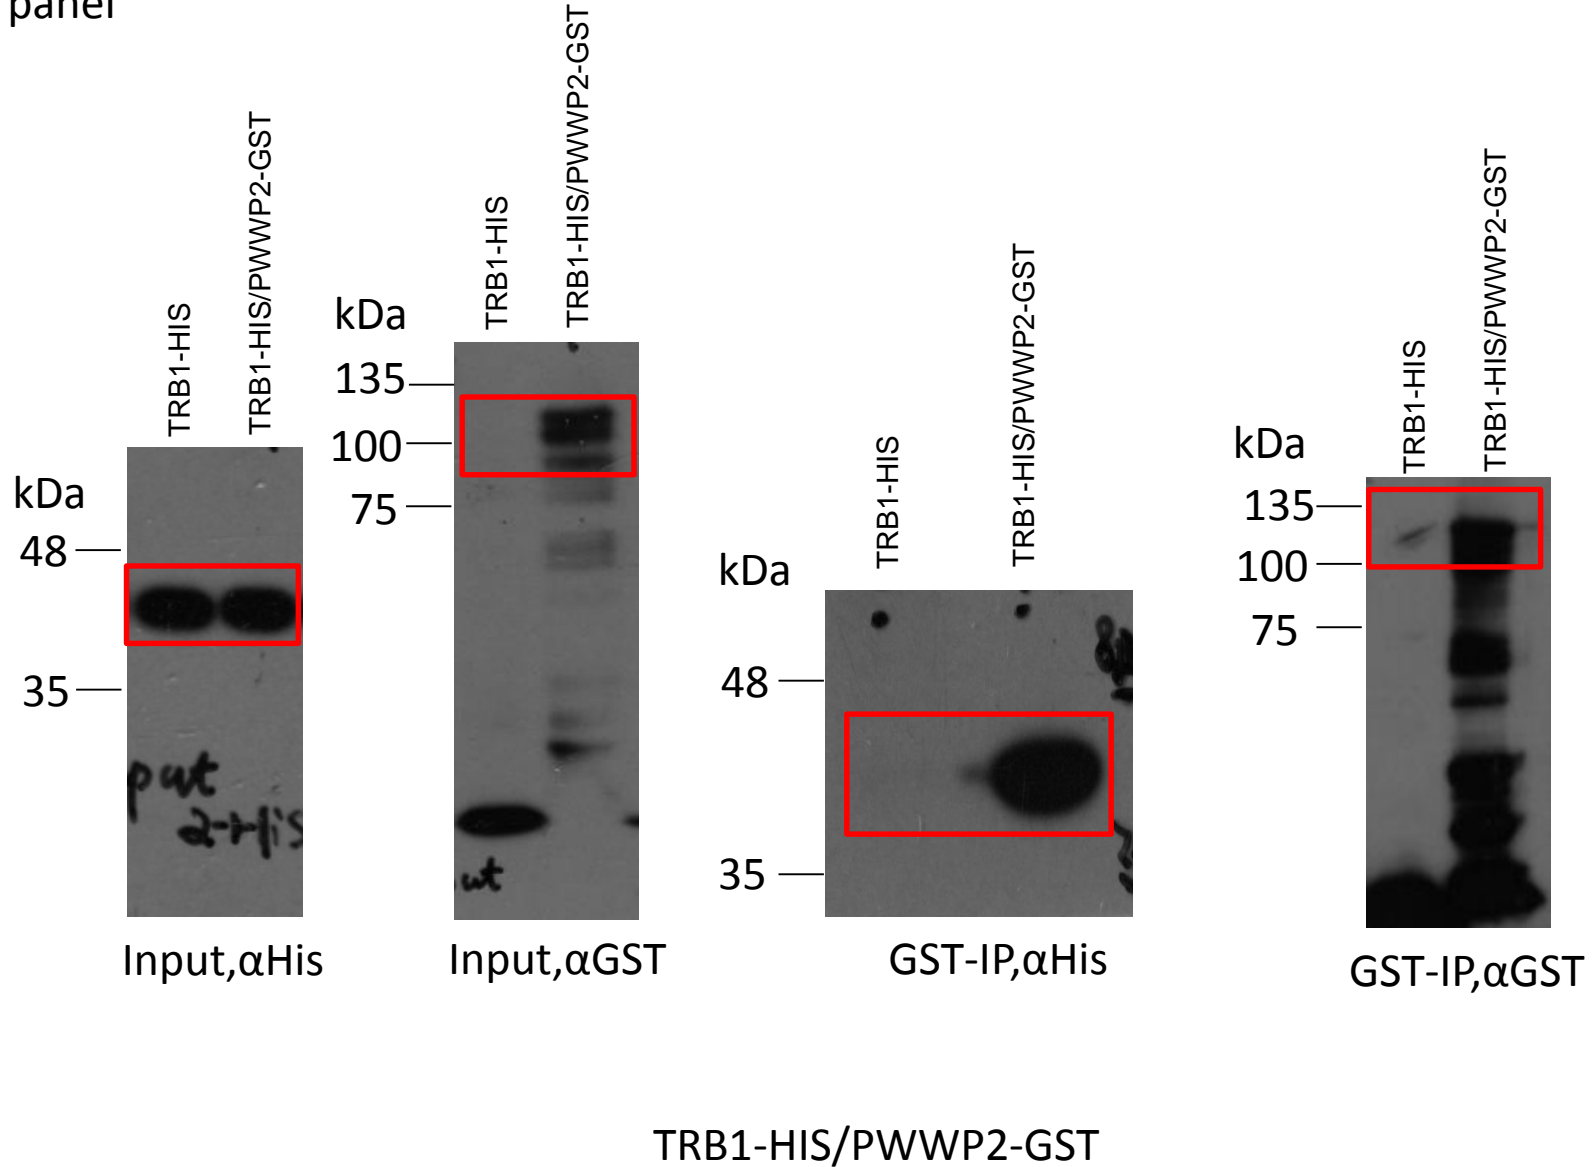

Figure 2E

Right panel

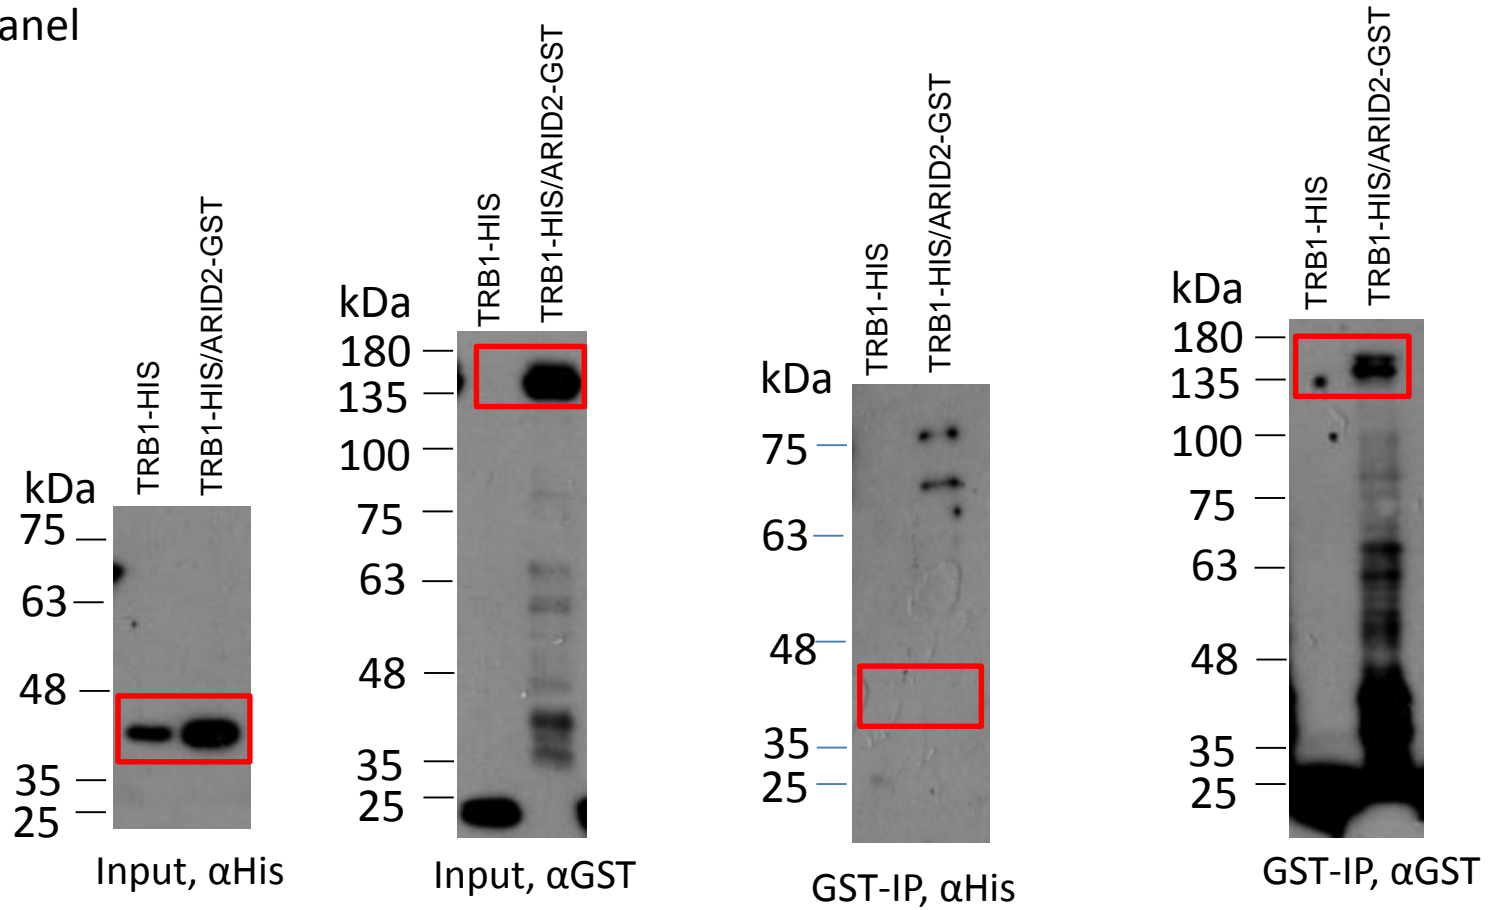

TRB1-HIS/ARID2-GST

Figure 2F ARID2-GST/PWWP2-His

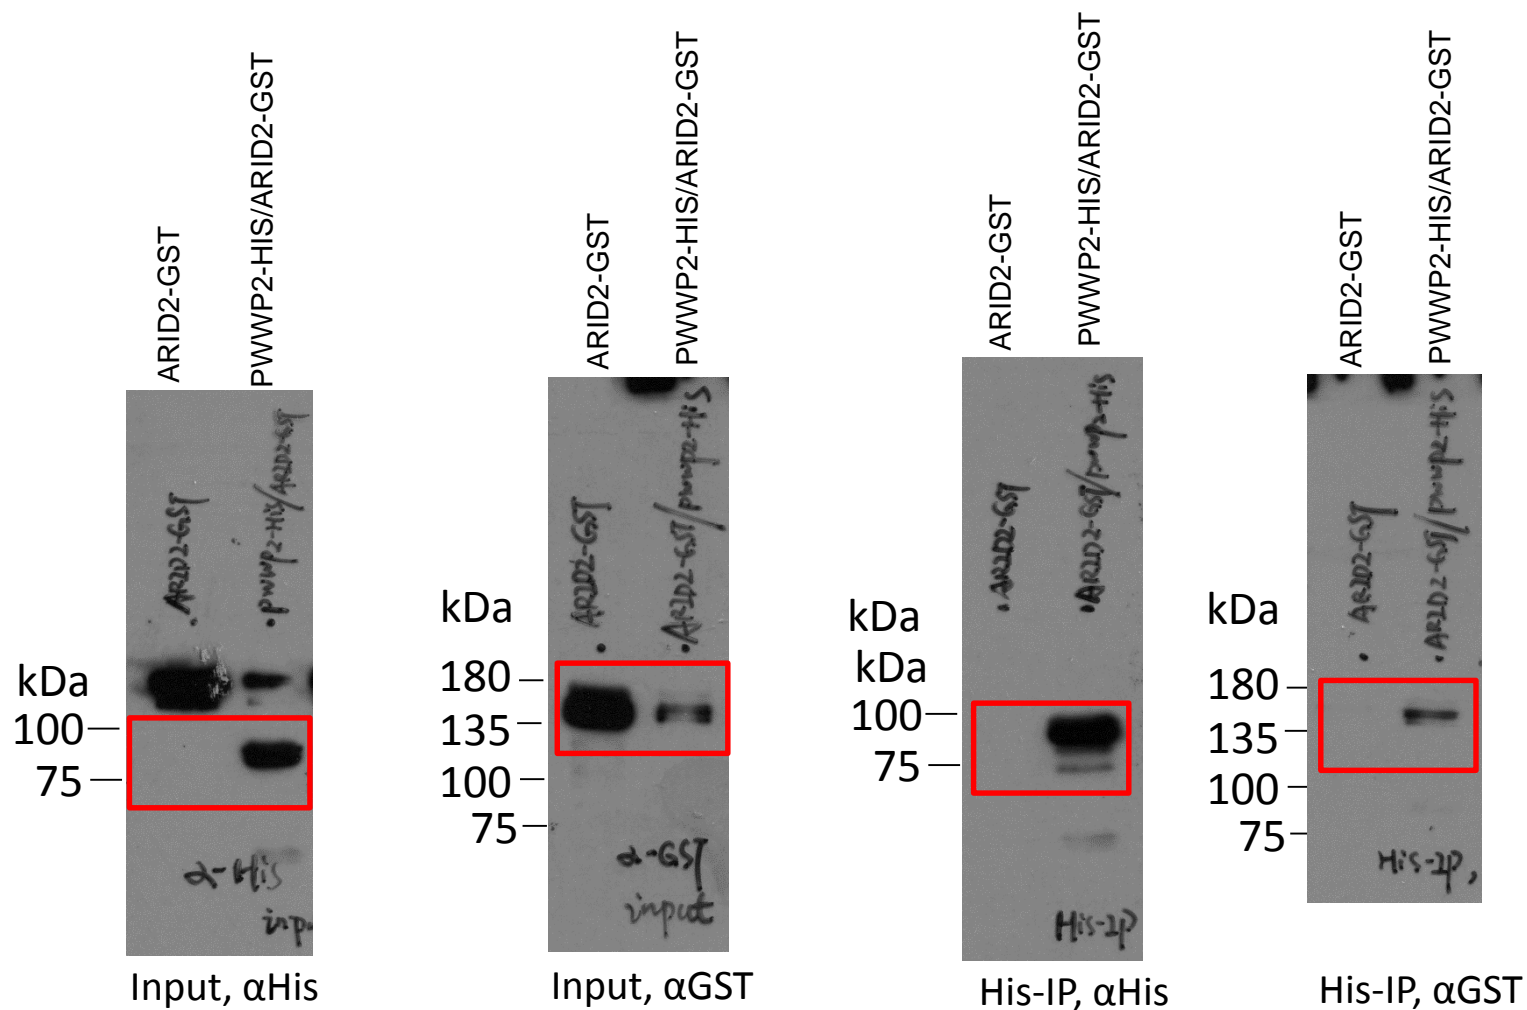

Fig 2F EPCR1-GST/PWWP2-His

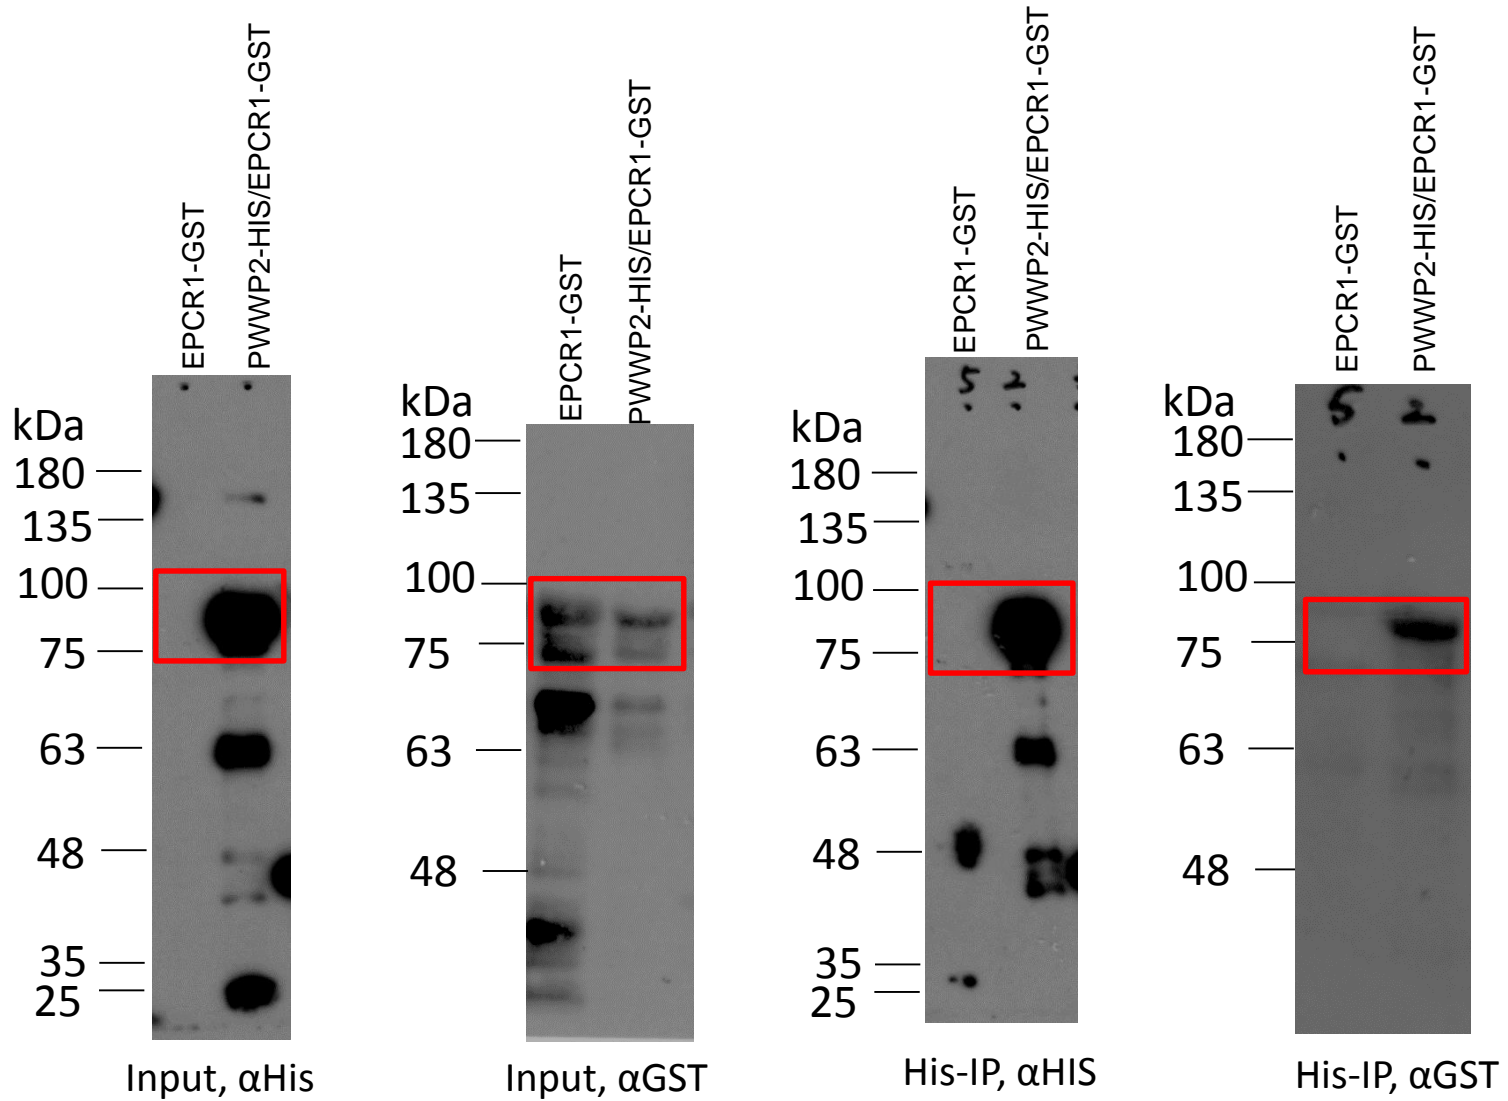

Fig 2F EPCR1-GST/ARID2-HIS

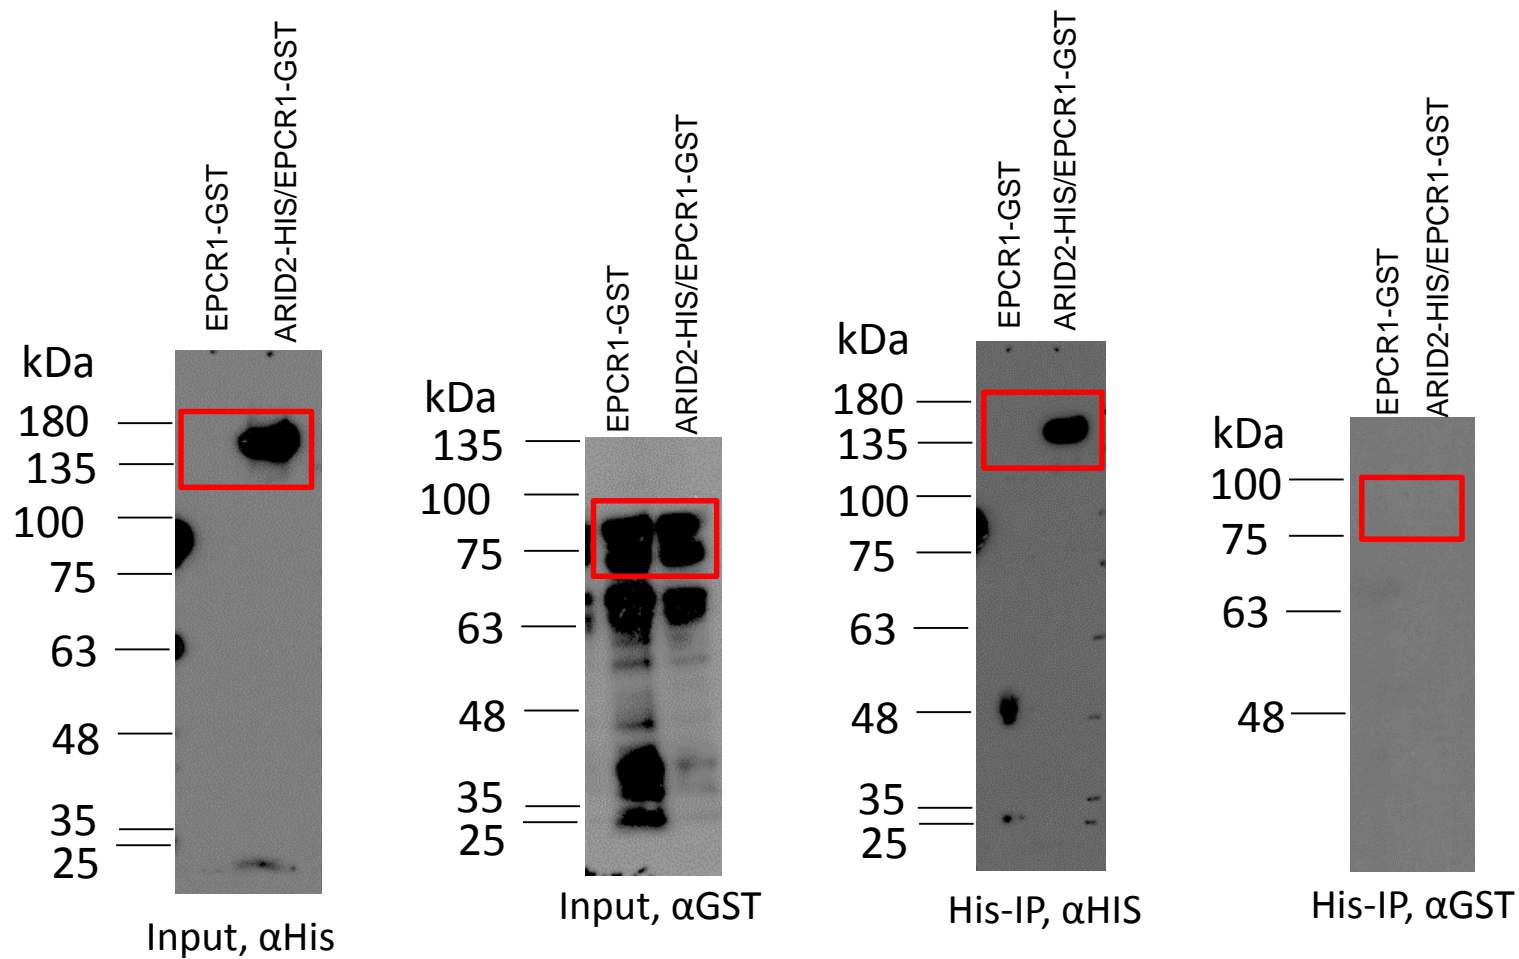



Fig 2F EPCR1-GST/TRB1-HIS

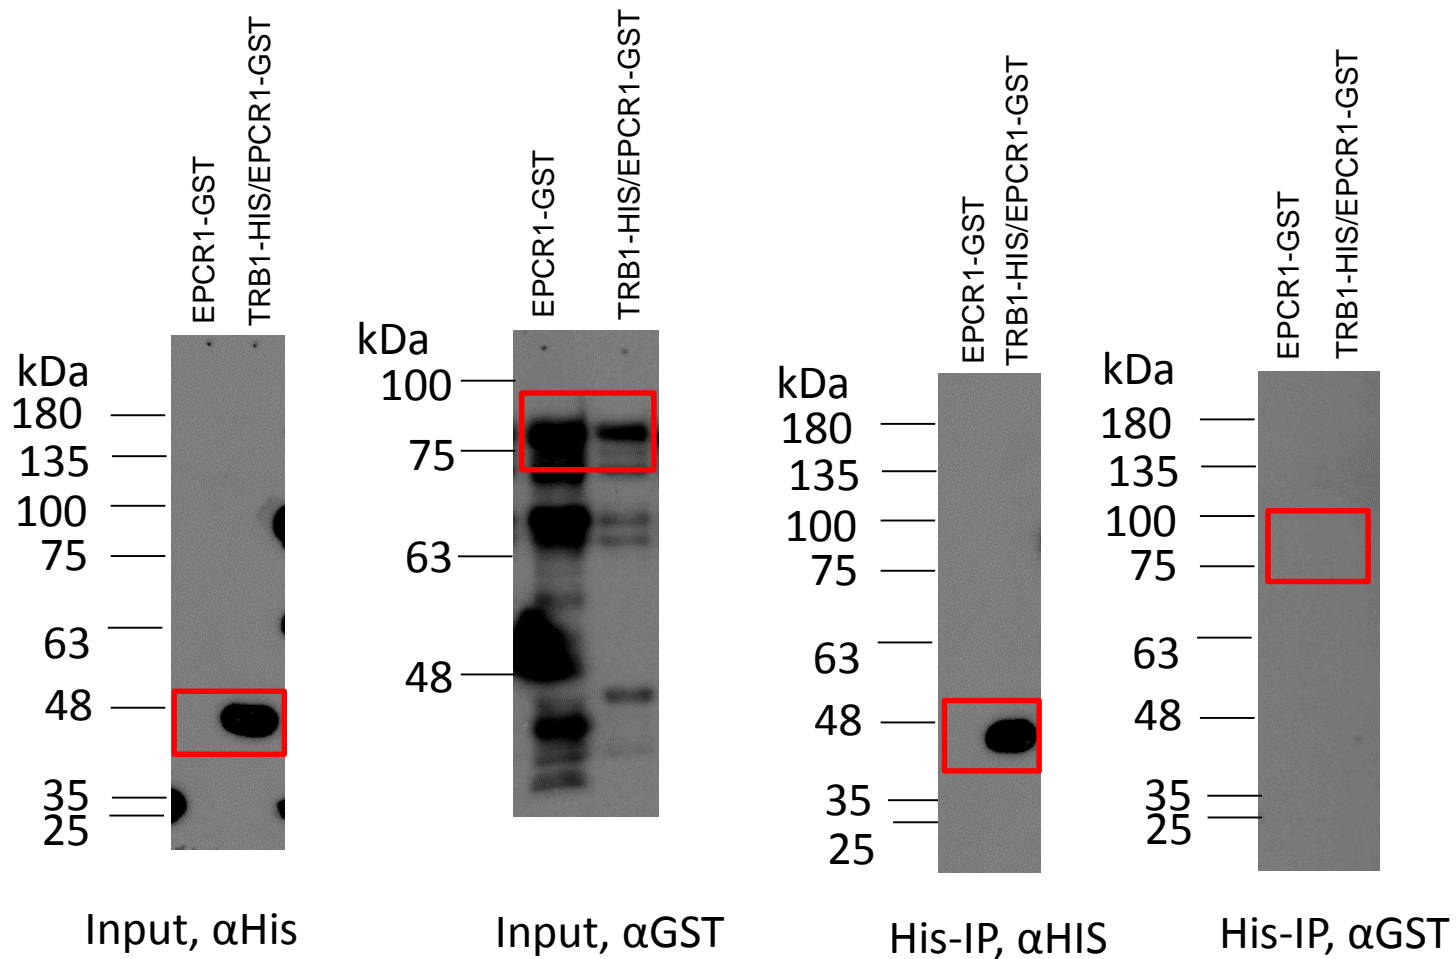

Supplement: EMBJ-37-e98770-s010.pdf [file EMBJ-37-e98770-s010.pdf]
