# Supplementary material
Source: PubMed Central journal article supplement (PMC6166130)
Supplement: EMBJ-37-e98770-s011.pdf [file EMBJ-37-e98770-s011.pdf]

Fig 5A



Fig 5B



Input,  $\alpha$ Flag



Input,  $\alpha$ Myc



Flag-IP,  $\alpha$ Flag



Flag-IP,  $\alpha$ Myc

Fig 5C



Fig 5D



Fig 5E
