# Supplementary material
Source: PubMed Central journal article supplement (PMC6166130)

Fig 8C

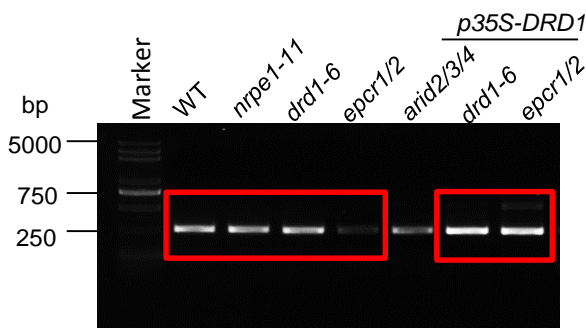

*DRD1*

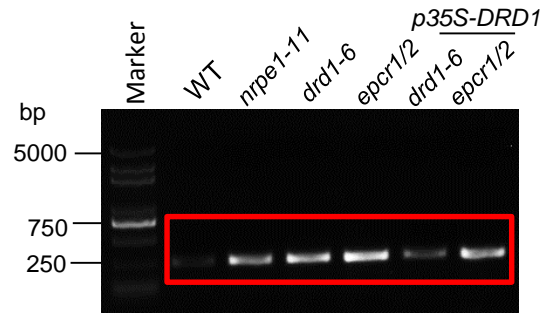

*AT2TE82000*

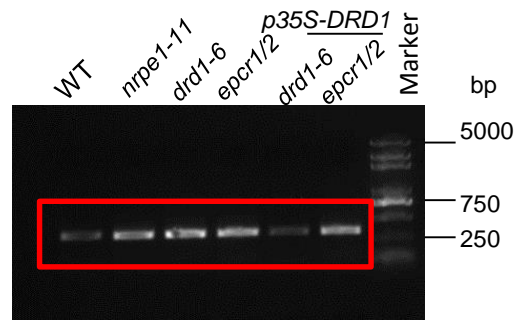

*AT4TE09845*

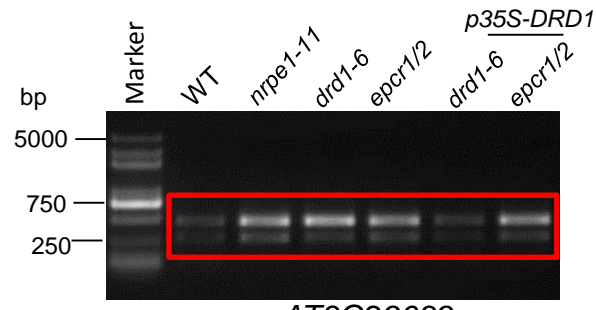

*AT3G29639*

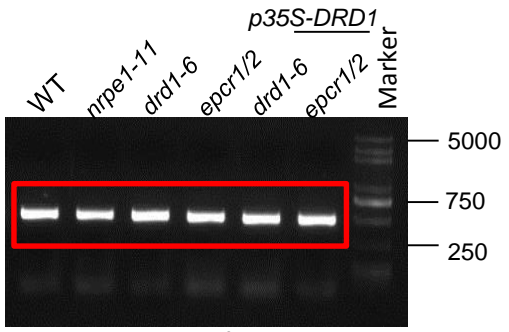

*actin*

Supplement: EMBJ-37-e98770-s012.pdf [file EMBJ-37-e98770-s012.pdf]
